# Supplementary material for: Matching Quantitative MRI Parameters with Histological Features of Treatment-Naïve IDH Wild-Type Glioma
Source: MDPI journal article supplement (doi:10.3390/cancers13164060), 2021-08-12
Supplement: s1 [file s1]

# Supplementary Figure S1

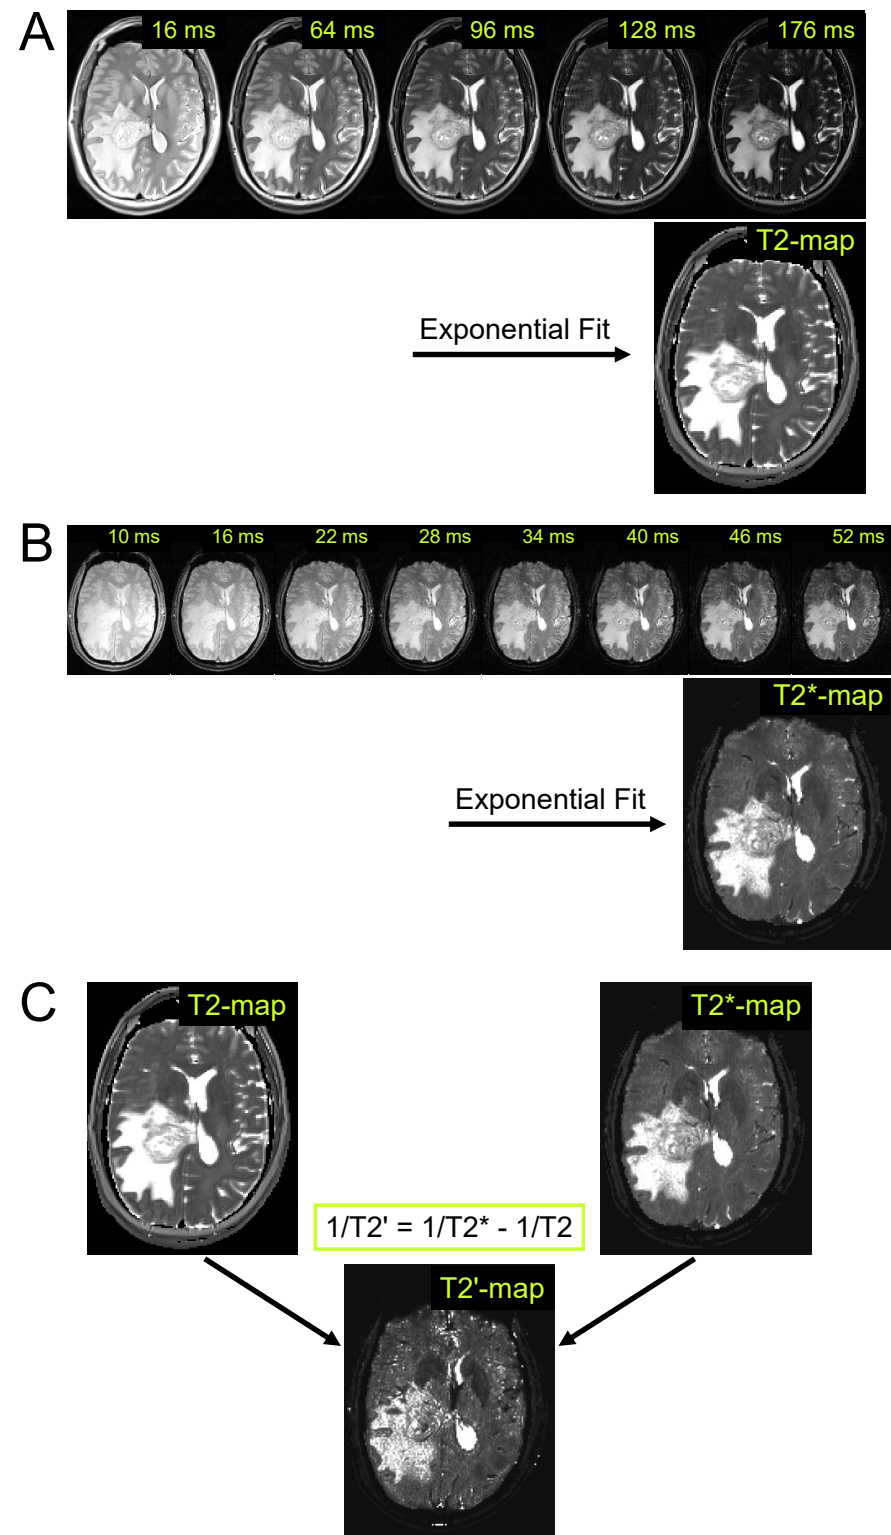

### Supplementary Table S1

Analysis of all 25 *IDH*-wildtype gliomas (n = 25) and those gliomas that histologically had been classified as glioblastomas (n = 23). Groups of non-tumor versus tumor samples and groups of samples with vascular proliferates (vasc.) versus samples without (no vasc.) were compared using the Welch's t-test. Note that biopsy specimens from the two patients with astrocytoma did not show vascular proliferates. N.s.: not significant.

| <b>All gliomas (25)</b>   | <b>parameter</b> | <b>group</b> | <b>mean</b> | <b>median</b> | <b>p</b>     |
|---------------------------|------------------|--------------|-------------|---------------|--------------|
|                           | T1               | no tumor     | 1408        | 1429          | 0.005        |
|                           |                  | tumor        | 1622        | 1537          |              |
|                           | T2               | no tumor     | 1318        | 1156          | 0.013        |
|                           |                  | tumor        | 1802        | 1356          |              |
|                           | T2*              | no tumor     | 665         | 537           | n.s.         |
|                           |                  | tumor        | 796         | 687           |              |
|                           | T2'              | no tumor     | 1816        | 1657          | n.s.         |
|                           |                  | tumor        | 2004        | 1672          |              |
|                           | T1rel            | no tumor     | 0.305       | 0.377         | 0.009        |
|                           |                  | tumor        | 0.445       | 0.534         |              |
| <b>Glioblastomas (23)</b> | <b>parameter</b> | <b>group</b> | <b>mean</b> | <b>median</b> | <b>p</b>     |
|                           | T1               | no tumor     | 1360        | 1231          | 0.001        |
|                           |                  | tumor        | 1598        | 1510          |              |
|                           | T2               | no tumor     | 1337        | 1153          | 0.029        |
|                           |                  | tumor        | 1837        | 1367          |              |
|                           | T2*              | no tumor     | 673         | 537           | n.s.         |
|                           |                  | tumor        | 813         | 700           |              |
|                           | T2'              | no tumor     | 1784        | 1685          | n.s.         |
|                           |                  | tumor        | 1998        | 1685          |              |
|                           | T1rel            | no tumor     | 0.279       | 0.309         | 0.002        |
|                           |                  | tumor        | 0.444       | 0.534         |              |
| <b>All gliomas (25)</b>   | <b>parameter</b> | <b>group</b> | <b>mean</b> | <b>median</b> | <b>p</b>     |
|                           | T1               | no vasc.     | 1502        | 1470          | n.s. (0.053) |
|                           |                  | vasc.        | 1622        | 1576          |              |
|                           | T2               | no vasc.     | 1765        | 1263          | n.s. (0.080) |
|                           |                  | vasc.        | 1422        | 1288          |              |
|                           | T2*              | no vasc.     | 756         | 668           | n.s.         |
|                           |                  | vasc.        | 755         | 608           |              |
|                           | T2'              | no vasc.     | 1823        | 1551          | n.s.         |
|                           |                  | vasc.        | 1977        | 1684          |              |
|                           | T1rel            | no vasc.     | 0.385       | 0.475         | 0.033        |
|                           |                  | vasc.        | 0.451       | 0.569         |              |
| <b>Glioblastomas (23)</b> | <b>parameter</b> | <b>group</b> | <b>mean</b> | <b>median</b> | <b>p</b>     |
|                           | T1               | no vasc.     | 1467        | 1389          | 0.018        |
|                           |                  | vasc.        | 1622        | 1576          |              |
|                           | T2               | no vasc.     | 1877        | 1359          | 0.033        |
|                           |                  | vasc.        | 1422        | 1288          |              |
|                           | T2*              | no vasc.     | 794         | 720           | n.s.         |
|                           |                  | vasc.        | 755         | 608           |              |
|                           | T2'              | no vasc.     | 1885        | 1624          | n.s.         |
|                           |                  | vasc.        | 1977        | 1684          |              |
|                           | T1rel            | no vasc.     | 0.385       | 0.475         | 0.033        |
|                           |                  | vasc.        | 0.451       | 0.569         |              |

Supplementary Table S2: Correlations of qMRI parameters and neuropathological features in glioblastoma samples. Significant correlations are highlighted in grey.  $r_s$  = Spearman correlation coefficient,  $p$  = p-value.

|              | cell density<br>[cells/mm <sup>2</sup> ] |       | vessel density<br>[vessels/mm <sup>2</sup> ] |        | necrosis [%] |       | CAIX [%] |       | LDHA [%] |        | Ki67 [%] |       |
|--------------|------------------------------------------|-------|----------------------------------------------|--------|--------------|-------|----------|-------|----------|--------|----------|-------|
|              | $r_s$                                    | $p$   | $r_s$                                        | $p$    | $r_s$        | $p$   | $r_s$    | $p$   | $r_s$    | $p$    | $r_s$    | $p$   |
| <b>T1</b>    | 0.001                                    | 0.990 | -0.234                                       | <0.001 | 0.081        | 0.166 | 0.084    | 0.193 | 0.240    | <0.001 | 0.007    | 0.911 |
| <b>T1rel</b> | 0.123                                    | 0.041 | -0.037                                       | 0.578  | -0.193       | 0.002 | -0.201   | 0.002 | 0.070    | 0.292  | 0.144    | 0.036 |
| <b>T2</b>    | -0.009                                   | 0.874 | -0.190                                       | 0.003  | -0.123       | 0.039 | -0.025   | 0.698 | 0.143    | 0.028  | 0.073    | 0.276 |
| <b>T2*</b>   | -0.010                                   | 0.859 | -0.230                                       | <0.001 | -0.116       | 0.053 | -0.017   | 0.797 | 0.208    | 0.001  | 0.015    | 0.818 |
| <b>T2'</b>   | -0.011                                   | 0.854 | -0.262                                       | <0.001 | -0.044       | 0.463 | -0.118   | 0.074 | 0.064    | 0.334  | 0.079    | 0.240 |

Supplementary Table S3: Correlations between histopathological features in glioblastoma samples. Significant correlations are highlighted in grey.  $r_s$  = Spearman correlation coefficient,  $p$  = p-value.

|                                              | cell density<br>[cells/mm <sup>2</sup> ] |        | vessel density<br>[vessels/mm <sup>2</sup> ] |       | necrosis [%] |        | CAIX [%] |        | LDHA [%] |       |
|----------------------------------------------|------------------------------------------|--------|----------------------------------------------|-------|--------------|--------|----------|--------|----------|-------|
|                                              | $r_s$                                    | $p$    | $r_s$                                        | $p$   | $r_s$        | $p$    | $r_s$    | $p$    | $r_s$    | $p$   |
| vessel density<br>[vessels/mm <sup>2</sup> ] | 0.278                                    | <0.001 |                                              |       |              |        |          |        |          |       |
| necrosis [%]                                 | -0.357                                   | <0.001 | -0.157                                       | 0.015 |              |        |          |        |          |       |
| CAIX [%]                                     | 0.033                                    | 0.611  | -0.094                                       | 0.150 | 0.549        | <0.001 |          |        |          |       |
| LDHA [%]                                     | 0.202                                    | 0.002  | -0.052                                       | 0.421 | 0.442        | <0.001 | 0.591    | <0.001 |          |       |
| Ki67 [%]                                     | 0.325                                    | <0.001 | 0.137                                        | 0.040 | -0.156       | 0.021  | -0.106   | 0.113  | 0.036    | 0.594 |
